# 1 **Multidimensional imbalances in cortical circuit activity in Fragile-X** 2 **Syndrome mice**

3 Cian O'Donnell<sup>1,2,\*</sup>, J. Tiago Gonçalves<sup>3,4</sup>, Carlos Portera-Cailliau<sup>3</sup> and Terrence J.  
4 Sejnowski<sup>2,5,\*</sup>

5 <sup>1</sup>Department of Computer Science, University of Bristol, Bristol, UK

6 <sup>2</sup>Howard Hughes Medical Institute, Salk Institute for Biological Studies, La Jolla CA, USA

7 <sup>3</sup>Departments of Neurology and Neurobiology, David Geffen School of Medicine at UCLA, Los  
8 Angeles, CA, USA

9 <sup>4</sup>Dominick Purpura Department of Neuroscience, Albert Einstein College of Medicine, Bronx,  
10 NY, USA

11 <sup>5</sup>Division of Biological Sciences, University of California at San Diego, La Jolla, CA, USA

12 \*Correspondence: cian.odonnell@bristol.ac.uk (C.O'D.), terry@salk.edu (T.J.S.)

## 13 **Abstract**

14 A leading theory for multiple neurodevelopmental brain disorders holds that they arise from  
15 imbalances in excitatory and inhibitory (E/I) brain circuitry. However this theory has rarely been  
16 quantitatively tested. Here we combined computational modeling and analysis of *in vivo* 2-  
17 photon Ca<sup>2+</sup> imaging data from cortex of wild-type and *Fmr1* knock-out (KO) mice to test the  
18 E/I imbalance model. Our main findings were: 1) the E/I imbalance model was not rich enough  
19 to capture the alterations in neural activity statistics in *Fmr1* KO mice; 2) greatly varying effects  
20 of synaptic and cellular properties on network activity; 3) opposite changes in circuit properties  
21 of *Fmr1* KO mice at different stages of development; 4) a reduction in the entropy of circuit  
22 activity in young *Fmr1* KO mice, but an opposite increase in adult *Fmr1* KO mice. These  
23 findings suggest qualitatively new strategies for understanding circuit alterations in Fragile-X  
24 Syndrome and related disorders.

## 25 **Introduction**

26 The nervous system shows complex organization at many spatial scales: from genes and  
27 molecules, to cells and synapses, to neural circuits. Ultimately, the electrical and chemical  
28 signaling at all of these levels must give rise to the behavioral and cognitive processes seen at  
29 the whole-organism level. When trying to understand prevalent brain disorders such as Autism  
30 and Schizophrenia, a natural question to ask is: where does the most productive level of  
31 neuroscientific investigation lie? Traditionally, most major disorders are diagnosed entirely at  
32 the behavioral level, whereas pharmaceutical interventions are targeted at correcting  
33 alterations at the molecular level. Even for the most successful drugs, we have little  
34 understanding of how these pharmaceutical actions at the molecular level percolate up the  
35 organizational ladder to affect behavior and cognition. This classic bottom-up approach may  
36 even be further confounded if phenotypic heterogeneity in Autism turns out not to reflect a  
37 unique cellular pathology, but rather a perturbation of network properties when neurons interact  
38 (Belmonte et al., 2004). These considerations imply that a more promising level of analysis  
39 might be at the level of neural circuits, for two reasons. First, circuits are closer to the  
40 behavioral level than the molecular signaling of cells is; therefore, it might be easier to predict  
41 how interventions at the circuit level affect behavior. Second, since we have fewer neurons  
42 than molecules and fewer neural circuits than neurons, the dimensionality of the brain's neural  
43 circuit properties is likely much smaller than that of the brain's molecular properties. It might  
44 turn out to be easier to find interventions that push circuit-level properties of brain disorder  
45 patients towards the operating regimes observed in healthy subjects, than it would be to  
46 correct the corresponding deficits in patients at the molecular level.

47 One prominent circuit-level hypothesis for brain disorders has been the idea of an imbalance in  
48 excitatory and inhibitory signaling. First proposed as a model for Autism (Rubenstein and  
49 Merzenich, 2003), the concept has since been applied to many other brain disorders, including  
50 Schizophrenia, Rett Syndrome, Fragile-X Syndrome, Tuberous Sclerosis, and Angelman  
51 Syndrome (Bateup et al., 2011; Dani et al., 2005; Gibson et al., 2008; Kehrer et al., 2008;  
52 Wallace et al., 2012). However, a major drawback of this model in its simplest form is that it is  
53 entirely 1-dimensional. It implies that either too much excitation or too much inhibition is

54 unhealthy, and by extension that the symptoms of these disorders could be normalized by  
55 either enhancing or reducing the level of, say, GABAergic signaling as appropriate. Although  
56 clinical trials for such GABAergic-based interventions are ongoing (Braat and Kooy, 2015), no  
57 treatment for a neurodevelopmental disorder based on this principle has yet been validated.

58 In this study we compare *in vivo* neocortical circuit activity data recorded from wild-type and  
59 Fragile-X model mice, and find that the classic 1-dimensional E/I imbalance model is not  
60 flexible enough to capture the observed differences. Instead, we argue that higher-dimensional  
61 models are needed. We demonstrate that a novel 2D neural circuit model can account for  
62 many of the differences in circuit activity that are likely important for neural coding and  
63 information processing. Finally, we apply a recently developed large-scale data analysis  
64 method (O'Donnell et al., 2017) to our Ca<sup>2+</sup> imaging data to uncover systematic shifts in neural  
65 circuit activity pattern properties across development in Fragile-X.

## 66 Results

67 Neural circuits consist of many components, connected together in a seemingly complicated  
68 fashion. These components typically interact non-linearly to generate circuit activity dynamics.  
69 Although many properties of cortical circuit components have been found to be altered in  
70 animal models of brain disorders, it remains extremely difficult to predict the net effect of  
71 varying any one particular parameter on circuit behavior.

72 To explore this issue more concretely, we built a computational model of layer (L) 2/3 mouse  
73 somatosensory cortex. This circuit has been studied in detail by neurophysiologists, and  
74 several of its properties have been found to be altered during development in mouse models of  
75 Fragile-X syndrome, including parvalbumin-positive interneuron number (Selby et al., 2007),  
76 GABA receptor reversal potential (He et al., 2014), dendritic spine dynamics (Cruz-Martin et al.,  
77 2010), and L4 excitatory input (Bureau et al., 2008), reviewed by (Contractor et al., 2015). In  
78 the ideal case we would like to derive a mathematical relationship between any arbitrary circuit  
79 parameter and its effect on circuit function, but for even reasonably complicated models this  
80 problem quickly becomes analytically intractable. Because of this difficulty, we used numerical  
81 computer simulations to perform hypothetical experiments where we perturbed various  
82 parameters of the circuit model and observed the resulting changes in circuit-level activity.  
83 Although we focus on this particular circuit for tractability, our general conclusions and  
84 methodology should be readily applicable to other brain circuits (Frye and Maclean, 2016).

85 The L2/3 computational model we built (Figure 1A, see Methods for details) consisted of four  
86 interconnected populations of leaky integrate-and-fire neurons: one group of 1700 excitatory  
87 (E) pyramidal neurons and three groups of inhibitory neurons: 115 5HT<sub>3A</sub>R-expressing neurons,  
88 70 parvalbumin-expressing (PV) neurons, and 45 somatostatin-expressing (SOM) neurons.  
89 This L2/3 circuit was driven by a separate population of 1500 L4 excitatory neurons. Cellular  
90 numbers, intrinsic properties, synaptic strengths, and connectivity statistics were taken from  
91 published *in vitro* data from P17–22 wild-type mice (Avermann et al., 2012; Lefort et al., 2009;  
92 Tomm et al., 2014).

93 L2/3 neurons of the rodent somatosensory neocortex respond only sparsely to sensory  
94 stimulation *in vivo*. For example, twitching a whisker activates, on average, only ~20% of  
95 neurons in its corresponding barrel, each of which typically emits only one action potential  
96 (Clancy et al., 2015; Kerr et al., 2007; Sato et al., 2007). Hence any individual neuron carries  
97 very little information about the stimulus on its own, implying that information must instead be  
98 encoded at the circuit level as the identities of the subset of neurons that respond.

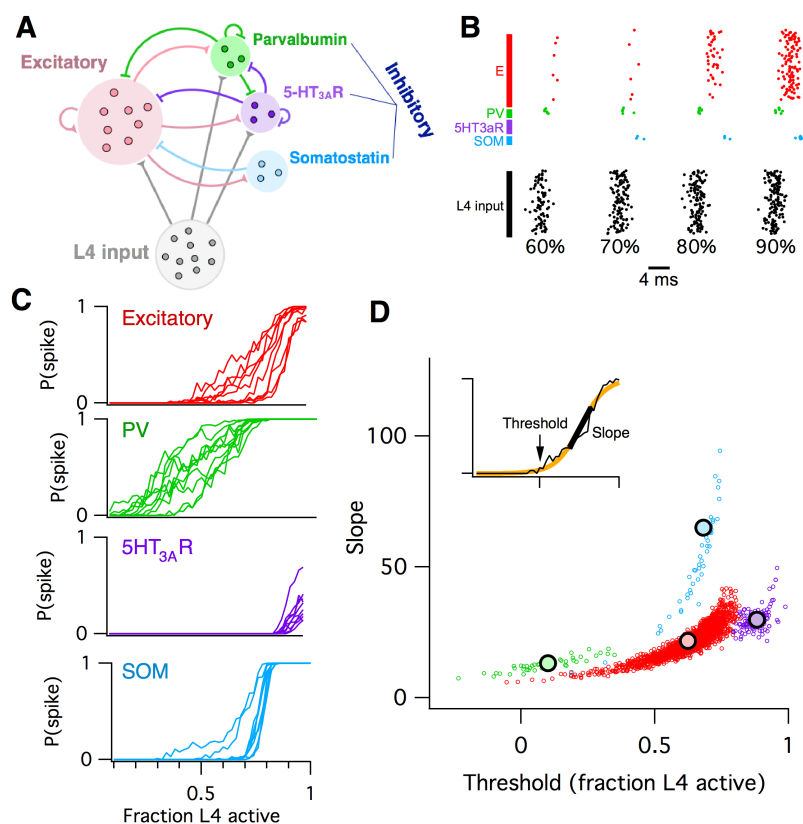

**Figure 1. Computational model of L2/3 mouse somatosensory cortex.**

**A:** Schematic diagram of computational circuit model.

**B:** Example raster plots of spiking responses from a subset of neurons from each cell type (colors as in panel A), for varying fractions of L4 activated (black).

**C:** Probability of spiking as a function of the fraction of L4 neurons activated. Each curve represents the response probability of a single neuron, averaged over multiple trials and multiple permutations of active L4 cells.

**D:** Each circle plots the fitted logistic slope and threshold values for a single neuron in the simulation. Circle color indicates cell type: red is excitatory, green is PV inhibitory, purple is 5ht3AR inhibitory, blue is SOM inhibitory. Large black circles indicate mean for each cell-type. Inset shows an example fitted logistic response function (orange) to the noisy simulation results from a single excitatory neuron (black).

99 To model whisker stimulation, we simulated a volley of spikes arriving from L4 as input to the  
100 population of L2/3 cells. We chose a random subset of L4 neurons as ON, then sent a single  
101 spike from each of these L4 cells to their target neurons in L2/3, and recorded the responses of  
102 all neurons in L2/3, some of which spiked and some of which did not. We repeated this  
103 identical stimulation multiple times, in order to get an average response probability for each  
104 L2/3 neuron, given the probabilistic vesicle release at synapses in the model. Then we chose a  
105 different random subset of L4 neurons as ON, and repeated the entire procedure. Finally, we  
106 varied the fraction of L4 cells active and plotted the probability of response for each individual  
107 L2/3 neuron as a function of L4 activity level (Figure 1B–C).

108 We found that the mean response probability of each neuron in the simulation increased from  
109 zero to one monotonically with increasing L4 activity level. Neurons of all four cell types  
110 responded to the L4 stimulus, including the SOM interneurons which did not receive direct L4  
111 input, but were instead excited by disynaptic connections via L2/3 excitatory neurons. The  
112 shape of the response curve varied systematically across cell types, and was heterogeneous  
113 for different neurons of a given cell type. To quantify these differences, we used logistic  
114 regression to fit the response profile of each neuron with a sigmoid function (Figure 1D, inset),  
115 which has just two parameters: the slope (representing the steepness of the response curve)  
116 and threshold (representing the minimal fraction of L4 neurons needed to activate the cell).  
117 When we plotted the fitted slope and threshold values for each neuron against each other, we  
118 found that each cell type falls into a distinct cluster in this 2-dimensional space. For example,  
119 all PV inhibitory neurons had a low slope and low threshold, whereas SOM inhibitory neurons  
120 had a steep slope and moderate threshold. We will use these slope-threshold measurements  
121 to summarize the circuit-level input-output function of this ‘default’ model of L2/3  
122 somatosensory cortex.

123 The circuit model contains 100 parameters (Materials and Methods), several of which are  
124 altered in Fragile-X mouse models. How sensitive is the circuit’s macroscopic input-output  
125 function to alterations in its low-level components? To test this, we varied 76 of the model  
126 parameters in turn by  $\pm 20\%$ , and repeated the entire set of simulations for each case  
127 (Materials and Methods). For each individual parameter alteration, we fit a new logistic

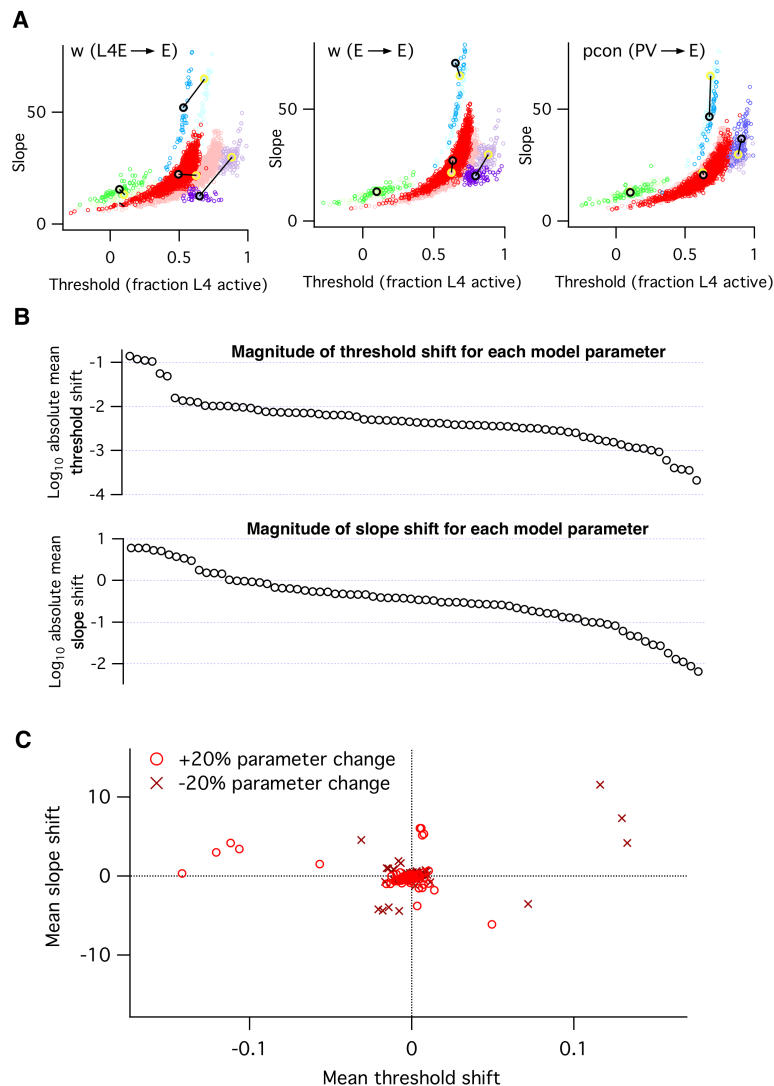

**Figure 2. Heterogeneous effects of varying L2/3 parameters on the circuit input-output function.**

**A:** Shifts in the distribution of fitted slope and threshold parameters as a result of increasing the strength of synapses from L4 to L2/3 E neurons (left), increasing the strength of recurrent synapses between L2/3 E neurons (center), or increasing the connection probability between L2/3 PV interneurons and E neurons (right). Transparent circles represent values for default network, heavy circles for altered network. The four colors represent different cell types, as in Figure 1. The default and altered group means are large yellow and black open circles, respectively.

**B:** Absolute values of mean shifts in threshold (upper plot) and slope (lower plot) for E neurons arising from increasing the value of each parameter by +20%. Note that data are presented on a log<sub>10</sub> scale.

**C:** The shift in mean slope-threshold parameter values for E neurons from the default network values, in response to each of the 59 circuit parameter alterations. Light red circles indicate +20% increase in parameter value; dark red crosses indicate a -20% decrease in parameter value.

128 response function for each model neuron. We summarize the results by plotting the logistic  
129 slope and threshold parameters and comparing their values to those found with the default  
130 model. The outcomes were hugely varied. We show three examples from the set of fifty-nine in  
131 Figure 2A, chosen to illustrate three qualitatively different effects that neural parameter  
132 changes can have on circuit function. First, when we increased the amplitude of postsynaptic  
133 potentials (PSPs) of excitatory synapses from L4 to L2/3 excitatory neurons, we found that the  
134 logistic threshold parameter of all cell types shifted leftwards to lower values (Figure 2A left),  
135 implying that fewer L4 neurons were needed to activate the entire L2/3 circuit. In contrast,  
136 when we increased the PSP amplitude of a different excitatory synapse, the recurrent  
137 connections between L2/3 excitatory neurons, we found (Figure 2A center) that excitatory and  
138 SOM inhibitory neurons had increased slope parameters relative to default, with little change in  
139 their threshold parameters. 5HT<sub>3A</sub>R inhibitory neurons had decreased slopes and thresholds,  
140 while PV neurons had little change at all. As a third example we increased the probability of  
141 inhibitory synaptic connections from L2/3 PV interneurons to L2/3 excitatory neurons (Figure  
142 2A right). In this case we found that excitatory neurons had a lower slope and increased  
143 threshold, SOM inhibitory neurons had a lower slope, 5HT<sub>3A</sub>R inhibitory neurons had both an  
144 increased slope and threshold, and PV neurons showed little change, even though their  
145 outgoing synapses were the parameter that was altered.

146 To synthesize the findings from all simulations, for each altered parameter we plotted the shift  
147 in mean slope-threshold values for L2/3 excitatory neurons from the mean values found with  
148 the default model (Figure 2B). We focused on excitatory neurons because they constitute 90%  
149 of the neurons in this layer (Lefort et al., 2009) and are the primary output to downstream  
150 circuits (Mao et al., 2011; Petreanu et al., 2007). Overall, we found a very heterogeneous  
151 picture. First, the magnitude of the shift in circuit response varied dramatically from parameter  
152 to parameter (Figure 2B—C). Varying some parameters, such as the first two examples given  
153 above, had large effects, whereas varying other parameters such as  $w_{15htE}$  (the strength of  
154 synapses from 5HT<sub>3A</sub>R inhibitory neurons to E neurons) or  $\tau m_{Som}$  (the membrane time  
155 constant of SOM inhibitory neurons) had little effect. Second, the direction of shift in 2-D slope-  
156 threshold space also depended on parameter (Figure 2C). Increasing some parameters



157 changed either circuit slope or threshold in isolation, while other parameters changed both  
158 slope and threshold together. All four quadrants of the slope-threshold plane could be reached  
159 by various subsets of the model parameters. Third, basic knowledge of whether a component  
160 was 'excitatory' or 'inhibitory' was insufficient to predict the direction of slope-threshold change.  
161 For example, the two glutamatergic projections considered in Figure 2A had distinct effects on  
162 circuit function.

163 In summary, these simulations indicate that the L2/3 somatosensory cortex circuit has  
164 extremely varied sensitivities to changes in its cellular components, and that the eventual  
165 circuit-level consequences cannot be predicted from knowledge of the class of the perturbed  
166 neurotransmitter alone.

### 167 ***Firing rates and correlations from the logistic model***

168 Above we investigated how low-level circuit components affect a high-level circuit input-output  
169 function, as parameterized by the slope and threshold of fitted logistic functions. But how is this  
170 logistic input-output function related to more common measures of neural population activity,  
171 such as firing rates and pairwise correlations between neurons? To investigate this, we  
172 considered the following reduced statistical model of cortical activity. We assumed for  
173 simplicity that the magnitude of the total input to the L2/3 circuit is a Gaussian distributed  
174 random variable, with zero mean and unit standard deviation (Figure 3A lower left). Then we  
175 described each L2/3 neuron's input-output as a logistic function as before (Figure 3A upper  
176 left), with threshold and slope defined relative to the Gaussian input's mean and standard  
177 deviation, respectively. Given this model, we can numerically calculate the probability  
178 distribution over a neuron's firing probability, which in general is skewed and non-Gaussian  
179 (Figure 3A upper right). From this function we compute (Methods) both the neuron's mean  
180 firing probability and the pairwise correlation of two identical neurons following this profile  
181 (Figure 3A lower right). Example samples from the model are illustrated in Figure 3B.

182 Neural firing rates and correlations had qualitatively different dependencies on the underlying  
183 logistic model's slope and threshold. Neural firing rate was greatest when threshold was low  
184 and slope was high (top left of phase plot, Figure 3C left), whereas correlations were greatest

185 when both threshold and slope were high (top right of phase plot, Figure 3C right). This implies  
186 that any change in the circuit's input-output function slope or threshold will in general have  
187 distinct effects on firing rate versus correlations, and so could not be captured by a 1-  
188 dimensional E/I balance model that sought to normalize firing rates alone. To illustrate this fact,  
189 we plot the calculated correlation values along a contour where firing probability is fixed at 0.1

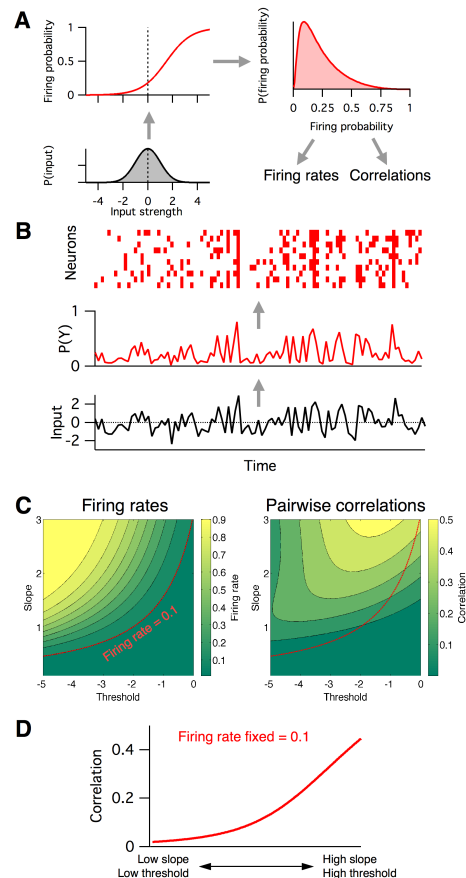

### Figure 3. Firing rates and pairwise correlations from the logistic response model.

**A:** Logistic model components. We assume a normally distributed input drive (gray distribution, bottom left), which is passed through the neuron's probabilistic spike input-output function (red curve, top left), which results in a distribution of spike probabilities (top right) that are determined by the input-output function's slope and threshold parameters. From the output distribution we can directly calculate the mean firing rate and correlation between a pair of such neurons (Methods).

**B:** Example spikes from the logistic model. The bottom trace (black) shows examples inputs over time drawn randomly from the same normal distribution. This is transformed to spike probability at each time point (red trace). Example spike trains can then be generated from the spike probability trace by drawing Bernoulli samples with the specified probabilities (red ticks, top). If each neuron's spike train is conditionally independent given the same spike probabilities, we can see correlations in their spike trains.

**C:** Calculated mean firing rate (left) and pairwise correlation (right) color maps as a function of the logistic threshold (x-axis) and slope (y-axis) parameters. Contours indicate lines of fixed firing rate or correlation in the 2D slope-threshold space.

**D:** Pairwise correlation values along the slope-threshold contour for firing rate = 0.1.

190 (Figure 3D). In the region of parameter space where both the slope and threshold are low  
191 (Figure 3C bottom left), correlations are low,  $\sim 0.01$ . However, as we move along the contour  
192 for firing rate = 0.1 towards the region of parameter space where slope and threshold are high  
193 (Figure 3C top right), the pairwise correlations increase to  $\sim 0.4$ . This shows that a 1-  
194 dimensional E/I balance rule that exclusively sought to normalize neural firing rates would  
195 leave neural correlations free to achieve arbitrary values.

196 How might these findings inform our understanding of neurodevelopmental disorders, such as  
197 Fragile-X syndrome? To explore this we fit the parameters of the logistic model to reproduce  
198 the statistics of spontaneous activity recorded from populations of neurons in unanesthetized  
199 mouse somatosensory cortex using in vivo two-photon  $\text{Ca}^{2+}$  imaging (data previously  
200 published in (Gonçalves et al., 2013), see Methods for experimental details). We compared the  
201 data from wild-type (WT) mice with *Frm1* KO mice, the best studied animal model for Fragile-X  
202 syndrome, across three different developmental time points: just before (P9–11) and after  
203 (P14–16) the critical period, and a more mature timepoint (P30–40). Example  $\Delta F/F$  raster  
204 plots from each group are shown in Figure 4A. We binned the data into 1 s timebins (originally  
205 imaged at 4 Hz), then transformed each neuron's timeseries of  $\Delta F/F$  values into a probabilistic  
206 sequence of binary ON/OFF values by assuming a Poisson firing model (Methods). We then  
207 summarized the neural population activity from each animal with three statistics: the mean ON  
208 probability across all recorded neurons (Figure 4C), the standard deviation (s.d.) in ON  
209 probability across neurons (Figure 4D), and the mean correlation between all pairs of neurons  
210 (Figure 4E). Together these measures capture both the statistics of the bulk population activity  
211 and some indication of the heterogeneity across neurons. Samples from the fitted models for  
212 each experimental group are shown in Figure 4B. For mean firing rates, the only change we  
213 detected was a decrease in firing probability in WT between P14–16 and P30–40 ( $p = 0.027$ ),  
214 which was coupled with an increased s.d. of firing rates ( $p = 0.015$ ). We also detected a higher  
215 firing rate s.d. in P9–11 KO animals than WT ( $p = 0.031$ ). Finally, as previously reported  
216 (Golshani et al., 2009; Gonçalves et al., 2013; Rochefort et al., 2009), we found a substantial

217 decrease in pairwise correlations in both genotypes across development, with slightly higher  
218 correlations in KO animals than WT at P9–11 ( $p = 0.029$ ) and P14–16 ( $p = 0.047$ ). These  
219 results are consistent with a general model where neural firing becomes desynchronized and  
220 sparsified around the critical period, at least in WT animals (Golshani et al., 2009; Rochefort et  
221 al., 2009).

222 For the three summary statistics from each animal, we used a gradient descent algorithm to  
223 find the five parameters of a population-level version of the logistic model that best matched  
224 the activity statistics (see Methods). For each animal, we plot the mean slope and mean  
225 threshold fits (Figure 4F) on top of the previously calculated (Figure 3C) 2D slope-threshold  
226 maps of firing rate and correlation. We find that in young animals, P9–11, most points are  
227 scattered at high values of both slope and threshold (Figure 4D left). With age, the parameter  
228 fits for both genotypes moved south-west towards the low slope and low threshold region of  
229 parameter space (Figure 4D center and right). The mean location of the cloud of points at each  
230 developmental age differed between WT and KO. We plot the direction of shift in group mean  
231 from WT to KO in Figure 4G. In young animals, P9–11 and P14–16, the KO group had both  
232 higher slope and higher threshold than WT, whereas in adult animals, P30–40, the KO group  
233 had a lower slope and lower threshold than WT. These results demonstrate an opposite  
234 direction of circuit parameter change in young Fragile-X mice compared to adults, which could  
235 not be captured by examining either neural firing rates or correlations.

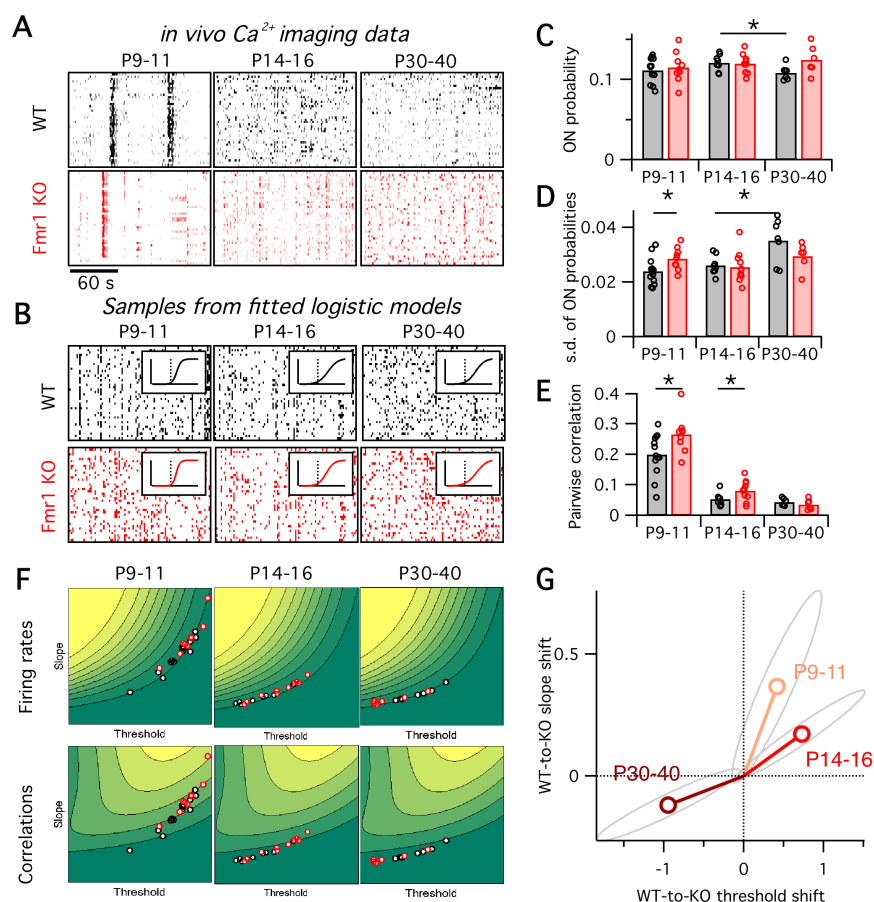

**Figure 4. Fragile-X fits from logistic model.**

**A:** Example  $Ca^{2+}$  imaging dF/F raster plots from a single animal from each of two genotypes, WT and *Fmr1* KO, and three age groups, P9–11, P14–16 and P30–40. In each case 3 minutes of data are shown from 40 neurons.

**B:** Example samples from the fitted logistic models, corresponding to the six groups shown in panel A. Inset shows group mean fitted logistic function, dashed vertical line represents zero.

**C–E:** Mean firing probability (C), standard deviation of firing probabilities (D) and mean pairwise correlation across all neurons (E). Each circle represents data from a single animal, bars represent group means.

**F:** Fitted logistic mean slope and mean threshold values for data from each WT (black circles) and *Fmr1* KO (red circles) animal. Values overlaid on same firing rate (top) and correlation (bottom) maps from Figure 3C.

**G:** Shift in mean logistic slope and threshold values from WT to KO for P9–11 (orange), P14–16 (red) and P30–40 (brown). Grey ellipses represent 95% confidence intervals (Methods).

236

237 Earlier we asked how sensitive the logistic model slope and threshold parameters were to

238 alterations in the many underlying neural circuit components (Figure 2). In a similar way, we

239 can also ask how sensitive the neural firing rates and correlations are to alterations in the  
240 logistic slope and threshold parameters. This is important since inspection of the 2-dimensional  
241 maps in Figure 2C shows that these sensitivities will differ depending on starting location within  
242 the slope-threshold space. To quantify this effect, we calculated the sensitivity of both the firing  
243 rate and correlations to small changes in the slope and threshold (Figure 5, see Methods),  
244 local to the fitted logistic parameter values for each animal (black and red circles in Figure 4F).  
245 Across all animals, we found that changes in the slope and threshold were qualitatively  
246 consistent but quantitatively inconsistent. Increasing the slope or decreasing the threshold  
247 always increased both firing rates and correlations. However, the magnitude of these effects  
248 depended strongly on developmental age (we found only minor differences between genotypes  
249 at any age). In young animals, P9–11, changes in the logistic threshold (solid bars in Figure  
250 5) had substantial effects on both firing rates and correlation. This sensitivity decreased with  
251 age ( $p \leq 0.013$  for firing rates,  $p < 0.01$  for correlations from P9–11 to P14–16, both for  
252 pooled data across genotypes), so that in adult animals, P30-40, changes in threshold had  
253 relatively little effect on neural activity statistics. A different picture emerged for the logistic  
254 slope parameter (striped bars in Figure 5). There, the firing rate sensitivity increased with from  
255 P9–11 to P14–16 ( $p < 1e-6$ ) (Figure 5A), while correlation sensitivity stayed approximately  
256 constant ( $p \geq 0.18$ ) (Figure 5B). These results show that the quantitative relationships between  
257 neural activity statistics and the underlying circuit parameters are not fixed across development.

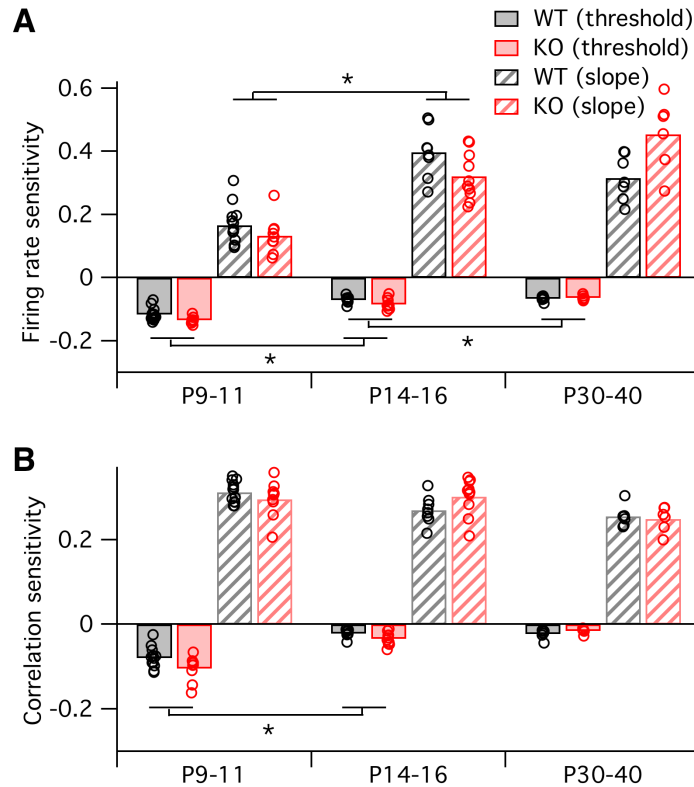

**Figure 5. Sensitivity of firing rate and correlations with respect to logistic model parameters, local to the parameter fit for each animal.**

Sensitivity of firing probability (A) and pairwise correlations (B) to change in threshold (solid bars) and slope (striped bars) parameters of logistic model, about the fitted parameter values for each animal (circles) displayed in Figure 4F. Bars represent group means. Each statistical test compares the mean values between adjacent pairs of age groups, where the data were pooled between genotypes.

258

259 What are the functional implications of these alterations in firing rates and correlations in  
260 Fragile-X mice across development? To address this, we attempted to calculate the entropy of  
261 the neural population activity for the data from each animal. Entropy is a quantity from  
262 information theory, measured in bits, that puts a hard upper bound on the amount of  
263 information that can be represented by any coding system (Cover and Thomas, 2006).  
264 Intuitively, the entropy measures how uniform the neural population activity pattern distribution  
265 is: it is large if the circuit exhibits many different activity patterns over time, and small if only a  
266 few activity patterns dominate. Entropy is an appealing measure for the present problem  
267 because it is sensitive both to neural firing rates and to correlations at all orders. It is typically



268 highest when firing rates are high and correlations are low. Although entropy is notoriously  
269 difficult to calculate for large neural populations because most estimation methods require  
270 impractically long data recordings (Quiñan Quiroga and Panzeri, 2009), we recently developed a  
271 new statistical method for this purpose, called the *population tracking model*, that scales well to  
272 large numbers of neurons, even for limited data (O'Donnell et al., 2017). We fit this population  
273 tracking model to the same  $\text{Ca}^{2+}$  imaging data as analyzed above (Figure 6). An intermediate  
274 step in estimating the neural entropy involves calculating a low-parameter approximation of the  
275 entire probability distribution over all  $2^N$  neural population activity patterns, where  $N$  is the  
276 number of neurons. The cumulatives of these probability distributions calculated for 50-neuron  
277 subsets of the recordings are shown in Figure 6A. In young animals P9–11, a small number of  
278 activity patterns accounts for a large fraction of the probability mass (Figure 6A left). For  
279 example, based on these curves, 50% of the time we would expect to see the same 1000–  
280 10,000 patterns out of a possible total  $2^{50} \approx 10^{15}$  patterns. In contrast, in older animals P14–  
281 16 and P30–40 the cumulative distributions shift rightwards so that more patterns are typically  
282 observed (Figure 6A center, right). In these cases, around 1,000,000 patterns are needed to  
283 account for 50% probability mass.

284 Instead of attempting to quantify these shifts by asking how many patterns are needed to cross  
285 an arbitrary threshold of probability mass, we instead calculated the entropy, which takes into  
286 account the shape of the entire probability distribution. The entropy depends on the number of  
287 neurons analyzed, so we normalized all estimates to calculate the entropy per neuron (Figure  
288 6B–C). Since we are treating neurons as binary, the entropy/neuron was bounded between 0  
289 and 1 bits. For all age groups, and for both WT and *Fmr1* KO animals, entropy/neuron  
290 progressively decreased with the number of neurons analyzed (Figure 6B). Because each  
291 imaging session captured a different number of neurons (range 40–198, median 97), we fit  
292 the entropy/neuron versus number of neurons data with a double exponential function (see  
293 Methods) and use the fit to provide a standardized estimate of the entropy/neuron for 100-  
294 neuron populations (Figure 6C). In WT animals, entropy/neuron showed a non-monotonic  
295 trajectory across development (O'Donnell et al., 2017). At P9–11 it was low, 0.38 bits (95% c.i.  
296 [0.35:0.41]), before increasing at P14–16 ( $p < 0.001$ ) to 0.50 bits (95% c.i. [0.48:0.52]), before



297 decreasing again at P30–40 ( $p = 0.028$ ) to 0.45 bits (95% c.i. [0.42:0.48]). We found a  
298 different entropy trajectory in *Fmr1* KO animals. There, although entropy/neuron also began  
299 low at 0.34 bits (95% c.i. [0.30:0.39]), not different from WT ( $p = 0.19$ ), when it increased at  
300 P14–16 ( $p < 0.001$ ) to 0.465 bits (95% c.i. [0.45:0.48]) it remained lower than for WT ( $p =$   
301 0.048). Finally, instead of decreasing as in the WT case, entropy continued to increase in  
302 P30–40 *Fmr1* KO animals ( $p = 0.033$ ) to 0.51 bits (95% c.i. [0.47:0.55]), higher than WT ( $p =$   
303 0.034). These entropy values estimated directly from  $\text{Ca}^{2+}$  imaging data agreed well with  
304 entropy estimates for synthetic data sampled from the previously fit logistic models  
305 (Supplementary Figure 1). In summary, unlike WT animals, *Fmr1* KO mice showed a  
306 monotonically increasing entropy/neuron from P9–11 to P30–40. Furthermore, the direction  
307 of change in entropy between P14–16 and P30–40 was opposite for WT and *Fmr1* KO  
308 animals, decreasing in the former and increasing in the latter.

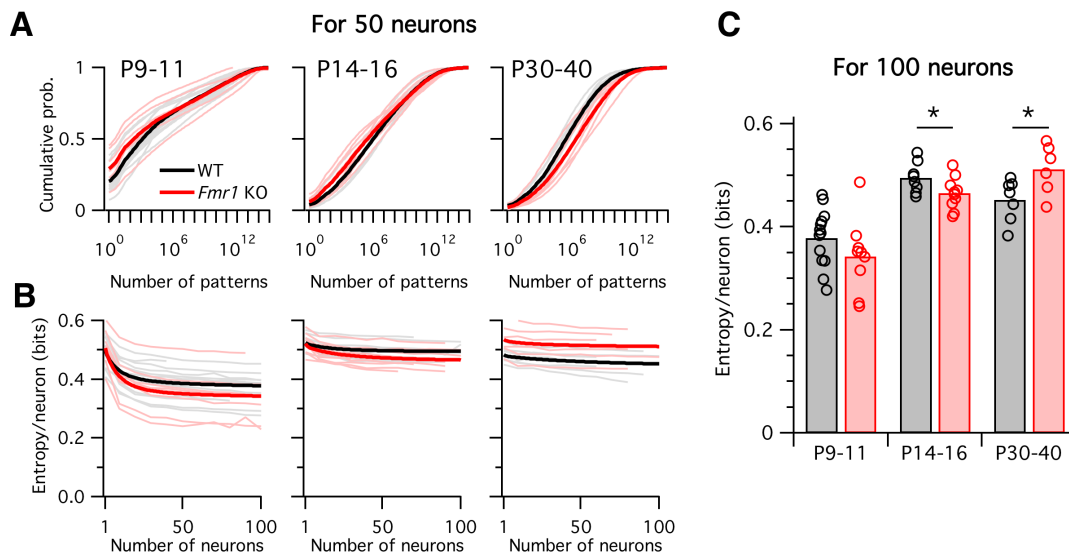

**Figure 6. Differing trajectories of WT and KO entropy across development.**

**A:** Cumulative probability mass as a function of the number of patterns. Patterns ordered from most probable to least probable. Thin lines are mean across many randomly-chosen 50-neuron subsets from a given animal, and thick lines represent means across all animals of a given genotype.

**B:** Entropy per neuron as a function of the number of neurons analyzed. Thin lines are mean across many randomly chosen subsets for a given animal, thick lines are group mean of double exponential fits to the data (see Methods). Age groups (left to right) are as in panel A.

**C:** Estimated entropy/neuron for 100 neuron populations. Circles represent individual animals, bars are group means.

309

## 310 **Discussion**

311 The 1-dimensional E/I imbalance model has been widely used for interpreting neural circuit  
312 changes observed in animal models of diverse brain disorders (Bateup et al., 2011; Dani et al.,  
313 2005; Gibson et al., 2008; Kehrer et al., 2008; Wallace et al., 2012). In the case of Fragile-X  
314 syndrome, the hyperexcitability prediction of the E/I imbalance model is consistent with many  
315 of the symptoms of the disease (e.g. seizures, hyperarousal, hyperactivity, hypersensitivity to  
316 sensory stimuli) and the known pathogenic defects implicated in *Fmr1* KO mice (diminished  
317 GABA signaling, exaggerated intrinsic excitability, increased neuronal firing rates; reviewed by  
318 (Contractor et al., 2015)). Here we extended this thinking to test the hypothesis that the E/I  
319 imbalance model can account for alterations in other neural activity statistics beyond the mean  
320 firing rates. However, our results demonstrate that it cannot. The model was too inflexible to  
321 account for the joint alterations in both neural firing rates and correlations observed in Fragile-  
322 X model mice. This suggests that future studies of brain disorders may need to consider  
323 higher-dimensional models of neural circuit dysfunction.

324 First, we built a detailed computational model of a specific neural circuit, L2/3 of mouse  
325 somatosensory cortex (Figure 1), and asked how sensitive the spiking responses of the overall  
326 circuit were to changes in its underlying neural components, many of which are known to be  
327 altered in *Fmr1* KO mice (Bureau et al., 2008; Gibson et al., 2008; Gonçalves et al., 2013;  
328 Harlow et al., 2010; Hays et al., 2011; Paluszkiwicz et al., 2011; Patel et al., 2013; Testa-Silva  
329 et al., 2012). We found that while changing some neural parameters did have a large effect,  
330 changing of other parameters had little or no effect on circuit function (Figure 2B). This  
331 property, termed sloppiness, has been reported as widely prevalent in computational models of  
332 biological systems (Gutenkunst et al., 2007; O'Leary et al., 2015). Its existence has two  
333 important implications for studies of brain disorders: first, many of the physiological component  
334 changes discovered in animal models may be entirely benign at the circuit level. Second, any  
335 treatment designed to correct circuit function does not necessarily need to correct all of the  
336 low-level properties in order to be successful.

337 In addition to the varying magnitudes of circuit components' effect on circuit function, we also  
338 found that different components shifted the circuit input-output function in different directions,  
339 as defined by our 2D logistic response model (Figures 1 and 2). Even circuit parameters that  
340 are nominally of the same type, such as the strength of glutamatergic synapses between  
341 excitatory (E) neurons in L4 to E neurons in L2/3 or synaptic strength between E neurons  
342 within L2/3, had qualitatively different effects on the circuit response to stimulation (Figure 2).  
343 According to the standard E/I imbalance model (Rubenstein and Merzenich, 2003), both of  
344 these parameters should have similar effects on circuit function; but according to the logistic  
345 response model we studied, their differing effects on slope and threshold parameters must  
346 necessarily lead to different magnitudes of change in neural firing rates and correlations  
347 (Figure 3C). Indeed, no 1-dimensional model of circuit function could ever capture the  
348 heterogeneity in parameter sensitivities that we observed (Figure 2B).

349 Next, we fit the parameters of the logistic response model to match the *in vivo* firing statistics of  
350 neural populations from WT and *Fmr1* KO mice of varying age (Figure 4). Previous studies had  
351 found that neural correlations decrease during development (Golshani et al., 2009; Rochefort  
352 et al., 2009), and that early postnatal *Fmr1* KO mice had higher correlations and firing rates  
353 than WT mice (Gonçalves et al., 2013; La Fata et al., 2014). A recent study suggests circuit  
354 hypersynchrony is also found in different mouse models of Rett syndrome (Lu et al., 2016).  
355 However, the relationship between these changes in firing statistics and the underlying neural  
356 circuit components were unclear. Our logistic model helps bridge this gap, leading to two  
357 findings: first, the direction of circuit parameter change from young (P9—11 and P14—16) to  
358 mature (P30—40) animals is opposite in WT to KO mice (Figure 4G). Similar opposing  
359 switches in sensory cortex properties with age were also recently reported in *Fmr1* KO rats  
360 (Berzhanskaya et al., 2016). Second, we found that the sensitivity of neural firing rates and  
361 correlations to changes in underlying circuit components depends on developmental age  
362 (Figure 5). Taken together, these findings imply that qualitatively different interventions may be  
363 needed at different stages of development in Fragile-X, and perhaps other  
364 neurodevelopmental disorders, to shift cortical circuit function towards typical wild-type  
365 operation.

366 Spontaneous, intrinsic activity is ubiquitously present in mammalian cerebral cortex. It is highly  
367 structured at multiple spatiotemporal scales (Mitra et al., 2015; Ringach, 2009) and interacts  
368 strongly with the signals evoked by sensory stimulation (Ringach, 2009). Cellular-resolution  
369 recordings in animals have shown that the patterns of spontaneous activity in neural  
370 populations are representative of the ensemble of activity patterns used by the brain to  
371 represent sensory stimuli (Berkes et al., 2011; Luczak et al., 2009; Miller et al., 2014). Here we  
372 found that the entropy of spontaneous activity in WT mouse somatosensory cortex follows an  
373 inverted-U shaped trajectory across development, and that this trajectory is dramatically  
374 altered in the *Fmr1* KO mouse model of Fragile-X (Figure 6). Although we saw no reliable  
375 differences across genotypes in early postnatal animals (P9–11), *Fmr1* KO animals showed  
376 lower entropy than WT after the second postnatal week (P14–16), while surprisingly switching  
377 to show higher entropy than WT in adult (P30–40). Notably, this switch in the direction of  
378 entropy change from WT to KO during development mirrors the reversing we saw in logistic  
379 model parameter changes in Figure 4G. Together, these findings suggest a perturbed  
380 trajectory of cortical development during the critical period in *Fmr1* KO mice (Meredith et al.,  
381 2012). However, our results cannot distinguish whether the observed perturbation in L2/3  
382 activity statistics reflects a developmental delay, or a permanently altered developmental  
383 trajectory. Further studies at later developmental time points are needed.

384 What is the functional significance of these shifts in population entropy? Previous work  
385 suggested that the entropy of neural circuit activity may be optimally tuned at intermediate  
386 levels as a trade-off between maximizing representational capacity at high entropy, versus  
387 maintaining error correction and regularization at low entropy (Schneidman et al., 2006). These  
388 properties can also be thought of as trading off between discrimination and generalization,  
389 respectively (Qian and Lipkin, 2011). If we assume that WT mice are optimally tuned, our  
390 findings predict that young *Fmr1* KO mice should show poorer somatosensory discrimination in  
391 behavioral tasks than wild-type animals, while in contrast adult *Fmr1* KO mice should perform  
392 more poorly on tasks involving generalization across somatosensory stimuli.

393 If the 1-dimensional E/I imbalance model is not sufficiently rich to capture the circuit changes  
394 observed in neurodevelopmental disorders, what should it be replaced with? How many

395 dimensions or degrees of freedom should a working model for a brain disorder have? We  
396 suggest that the most promising approach is to start by considering the computational function  
397 of a particular neural circuit, then working backwards to design a model that is both  
398 sophisticated enough to capture the key information processing features of the circuit, but  
399 simple enough to interpret and link to physiological data. In this study we considered a 2-  
400 parameter model of L2/3 somatosensory cortex's input-output function, which could account for  
401 both neural firing rates and correlations. Other brain circuits may demand models with more  
402 degrees of freedom. Crucially, the most informative models need not be those that include the  
403 highest level of physiological detail. All models are ultimately wrong in the sense that they  
404 make abstractions about their underlying parts, and detailed models carry the additional  
405 burden of fitting many parameters, which may be difficult to adequately constrain (O'Leary et  
406 al., 2015).

407 One potential use of simple parametric circuit models such as the ones we employed here may  
408 be as a tool for rationally designing candidate intervention compounds and then screening their  
409 effects on neural population activity. For example, the current study could have been extended  
410 to fit the logistic model to neural activity data from another cohort of *Frm1* KO mice that had  
411 received a candidate treatment, then ask if the fitted model parameters were closer in value to  
412 those from WT animals or *Fmr1* KO controls. Approaches like this could complement the  
413 traditional strategy of designing drugs based on reversing molecular deficits and then  
414 assessing the drug's impact on animal model behavior. Indeed, our results suggest that given  
415 the multi-dimensionality of circuit properties, it may prove difficult or impossible to find a single  
416 compound that can correctly reverse deficits at any age. This scenario might require a  
417 combination of drugs chosen to push circuit-level properties towards the 'correct' region of  
418 parameter space. The framework we have introduced in this study can facilitate this type of  
419 high-dimensional intervention analysis for diverse neurodevelopmental disorders.

420

421

## 422 **Materials and Methods**

### 423 ***Mouse in vivo calcium imaging recording***

424 All Ca<sup>2+</sup> imaging data were published previously (Gonçalves et al., 2013). Briefly, data were  
425 collected from male and female C57Bl/6 wild-type mice at P9–40. Mice were anesthetized with  
426 isoflurane, and a cranial window was fitted over primary somatosensory cortex by stereotaxic  
427 coordinates. Mice were then transferred to a two-photon microscope and headfixed to the  
428 stage while still under isoflurane anesthesia. 2–4 injections of the Ca<sup>2+</sup> sensitive Oregon-  
429 Green BAPTA-1 (OGB) dye and sulforhodamine-101 (to visualize astrocytes) were injected  
430 200  $\mu\text{m}$  below the dura. Calcium imaging was performed using a Ti-Sapphire Chameleon Ultra  
431 II laser (Coherent) tuned to 800 nm. Imaging in unanesthetized mice began within 30-60 mins  
432 of stopping the flow of isoflurane after the last OGB injection. Images were acquired using  
433 ScanImage software (Pologruto et al., 2004) written in MATLAB (MathWorks). Whole-field  
434 images were collected using a 20 $\times$  0.95 NA objective (Olympus) at an acquisition speed of 3.9  
435 Hz (512  $\times$  128 pixels). Several 3-minute movies were concatenated and brief segments of  
436 motion artifacts were removed (always <10 s total). Data were corrected for x–y drift. Cell  
437 contours were automatically detected and the average  $\Delta F/F$  signal of each cell body was  
438 calculated at each time point. Each  $\Delta F/F$  trace was low-pass filtered using a Butterworth filter  
439 (coefficient of 0.16) and deconvolved with a 2 s single-exponential kernel (Yaksi and Friedrich,  
440 2006). To remove baseline noise, the standard deviation of all points below zero in each  
441 deconvolved trace was calculated, multiplied by two, and set as the positive threshold level  
442 below which all points in the deconvolved trace were set to zero. Estimated firing rates of the  
443 neurons,  $r_i(t)$ , were then obtained by multiplying the deconvolved trace by a factor previously  
444 derived empirically from cell-attached recordings in vivo (Golshani et al., 2009).

### 445 **Computational methods**

446 Data analysis and logistic model calculations were done using MATLAB (Mathworks).

### 447 **Detailed layer 2/3 model simulations**

448 Layer 2/3 model simulations (Figures 1 and 2) were implemented with the Python-based  
449 simulator Brian (<http://briansimulator.org/>) (Goodman and Brette, 2009), and results analyzed  
450 with MATLAB (Mathworks). The model consisted of four populations of reciprocally connected



451 leaky integrate-and-fire neurons representing a L2/3 somatosensory barrel circuit: 1700  
452 excitatory neurons, 70 PV inhibitory neurons, 115 5HT<sub>3A</sub>R inhibitory neurons, and 45 SOM  
453 inhibitory neurons, driven by a separate population of 1500 excitatory spike sources  
454 representing input from L4. Cell numbers were estimated by combining layer-specific excitatory  
455 and inhibitory cell count information from (Lefort et al., 2009) with the approximate percentages  
456 of the three inhibitory cell groups given by (Petersen and Crochet, 2013). All synaptic  
457 connections were formed probabilistically by drawing independent random Bernoulli variables  
458 with connection type-specific probabilities. Synaptic PSP amplitudes were drawn  
459 independently for each synapse from a log-normal distribution constrained by the  
460 experimentally reported mean and median values for each particular connection type.  
461 Synapses in the model were conductance-based, but since synaptic strengths reported in the  
462 literature were typically in terms of EPSP/IPSP amplitude, in accordance with how the  
463 experiments were performed (Avermann et al., 2012), we set each maximal synaptic  
464 conductance as the value needed to generate a PSP of the desired amplitude when the target  
465 neuron started at resting potential in the case of EPSPs or -55mV in the case of IPSPs, which  
466 we computed analytically. Refractory periods were calculated as the inter-spike-interval  
467 corresponding to the maximal experimentally reported firing rate. Release probability and  
468 synaptic strength values for unconnected neurons are excluded from Table 1. Excitatory  
469 synaptic time constants were set at 2 ms, which is typical for the fast component of AMPA  
470 receptor responses, but could not be estimated from the PSP statistics in (Avermann et al.,  
471 2012) because of masking by the slower membrane time constant. The mathematical form of  
472 our model meant that inhibitory synaptic time constants needed to be equal for all incoming  
473 inhibitory synapses to a neuron. We set these to 40 ms for E, 5HT<sub>3A</sub>R and SOM neurons and  
474 16 ms for PV neurons, which were the typical values of the IPSP decay time constants in the  
475 (Avermann et al., 2012) dataset. Due to lack of direct data for this circuit, connection  
476 probabilities for synapses from L4 E neurons to E, PV and SOM L2/3 neurons was set to a  
477 typical cortical value of 0.15, while 5HT<sub>3A</sub>R neurons did not receive any input from L4 (Gentet  
478 et al., 2012). Similarly due to a lack of direct data, we set synaptic release probabilities for  
479 connections from L4 to L2/3 neurons to a typical cortical value of 0.25, while mean and median  
480 L4 excitatory PSP amplitudes onto L2/3 PV and SOM were set to 0.8 and 0.48 mV,

481 respectively, to match reported data for L4 EPSP amplitudes onto L2/3 E neurons (Lefort et al.,  
 482 2009). L4 neuron dynamics were not explicitly simulated, but instead modeled only as a set of  
 483 output spike trains. After selecting the subset of active L4 neurons (see Results), spike times  
 484 were drawn randomly from a Gaussian distribution with standard deviation of 2 ms.

485 For the simulations presented in Figure 2 we varied only 76 model parameters, which is 24  
 486 less than the total number of 100 model parameters listed in Table 1. We excluded the four  
 487 neuronal refractory periods (because in almost all simulations each neuron spiked a maximum  
 488 of once, making the refractory period irrelevant), and the six connection probabilities that were  
 489 fixed at zero. Finally, we grouped together the mean and median PSP amplitudes for each of  
 490 the fourteen non-zero synaptic connections, so that both parameters were increased or  
 491 decreased by the same fraction in tandem. Together these choices reduced the number of test  
 492 parameters from 100 to 76.

493 For all parameters that naturally range from 0 upwards, such as the number of neurons or  
 494 release probability, we increased or decreased their values during testing in the most intuitive  
 495 way, by adding +/- 20% of the baseline value. However, this method was less useful for other  
 496 parameters, such as cell resting voltage, for which we reasoned it made more sense to scale  
 497 relative to another parameter, such as spike threshold. As a result, we varied 1) resting voltage  
 498 relative to its difference from spike threshold; 2) spike threshold relative to its difference with  
 499 resting voltage; 3) excitatory synaptic reversal potentials relative to resting voltage; 4) inhibitory  
 500 synaptic reversal potentials relative to spike threshold.

| Table 1. L2/3 computational circuit model parameters and mean slope & threshold shifts. |        |        |                                              |                        |       |         |                                                  |
|-----------------------------------------------------------------------------------------|--------|--------|----------------------------------------------|------------------------|-------|---------|--------------------------------------------------|
| Parameter                                                                               | Value  | Source | +20% effect on slope, thresh                 | Parameter              | Value | Source  | +20% effect on slope, thresh                     |
| $N_E$                                                                                   | 1700   | [1]    | slope: $6.4 \times 10^{-3}$<br>thresh: 5.16  | $pcon_{I5htE}$         | 0.465 | [2]     | slope: $-3.25 \times 10^{-3}$<br>thresh: -0.103  |
| $N_{I_{pv}}$                                                                            | 70     | [1]    | slope: $4.3 \times 10^{-3}$<br>thresh: -1.51 | $pcon_{I5htI_{pv}}$    | 0.38  | [2]     | slope: $-7.13 \times 10^{-3}$<br>thresh: -0.298  |
| $N_{I5ht}$                                                                              | 115    | [1]    | slope: -0.0104<br>thresh: -0.58              | $pcon_{I5htI5ht}$      | 0.38  | [2]     | slope: $6.07 \times 10^{-4}$<br>thresh: 0.175    |
| $N_{I_{som}}$                                                                           | 45     | [1]    | slope: -0.001<br>thresh: -0.83               | $pcon_{I5htI_{som}}$   | 0     | No data | Not tested                                       |
| $N_{EL4}$                                                                               | 1500   | [1]    | slope: -0.106<br>thresh: 3.43                | $pcon_{I_{som}E}$      | 0.5   | [5]     | slope: $-6.29 \times 10^{-3}$<br>thresh: -0.8919 |
| $V_{restE}$                                                                             | -68 mV | [2]    | slope: 0.049<br>thresh: -6.09                | $pcon_{I_{som}I_{pv}}$ | 0     | No data | Not tested                                       |
| $V_{restI_{pv}}$                                                                        | -68 mV | [2]    | slope: -0.016                                | $pcon_{I_{som}I5ht}$   | 0     | No data | Not tested                                       |



|                     |                |                  |                                                  |                      |         |              |                                                               |
|---------------------|----------------|------------------|--------------------------------------------------|----------------------|---------|--------------|---------------------------------------------------------------|
|                     |                |                  | thresh: -0.963                                   |                      |         |              |                                                               |
| $Vrest_{I5ht}$      | -62 mV         | [2]              | slope: $-9.48 \times 10^{-4}$<br>thresh: 0.205   | $pcon_{I5htI5ht}$    | 0       | No data      | Not tested                                                    |
| $Vrest_{I5om}$      | -57 mV         | [3]              | slope: $3.58 \times 10^{-3}$<br>thresh: 0.034    | $pre_{EL4E}$         | 0.25    | No data      | slope: -0.112<br>thresh: 4.21                                 |
| $Vth_E$             | -38 mV         | [2]              | slope: $-3.76 \times 10^{-3}$<br>thresh: -0.381  | $pre_{EL4I5pv}$      | 0.25    | No data      | slope: 0.0103<br>thresh: 0.682                                |
| $Vth_{I5pv}$        | -37.4 mV       | [2]              | slope: $3.87 \times 10^{-3}$<br>thresh: 0.221    | $pre_{EL4I5om}$      | 0.25    | No data      | slope: $-2.06 \times 10^{-3}$<br>thresh: -0.537               |
| $Vth_{I5ht}$        | -36 mV         | [2]              | slope: $-1.12 \times 10^{-3}$<br>thresh: 0.013   | $pre_{EE}$           | 0.25    | No data      | slope: $4.99 \times 10^{-3}$<br>thresh: 6.074                 |
| $Vth_{I5om}$        | -40 mV         | [3]              | slope: $-3.26 \times 10^{-3}$<br>thresh: -0.083  | $pre_{EI5pv}$        | 0.25    | No data      | slope: $-4.04 \times 10^{-4}$<br>thresh: 0.163                |
| $Rin_E$             | 160 M $\Omega$ | [2]              | slope: $1.95 \times 10^{-3}$<br>thresh: -0.283   | $pre_{EI5ht}$        | 0.25    | No data      | slope: $-9.32 \times 10^{-3}$<br>thresh: -0.532               |
| $Rin_{I5pv}$        | 100 M $\Omega$ | [2]              | slope: $-8.38 \times 10^{-3}$<br>thresh: -0.283  | $pre_{EI5om}$        | 0.25    | No data      | slope: $-7.32 \times 10^{-3}$<br>thresh: -0.3847              |
| $Rin_{I5ht}$        | 200 M $\Omega$ | [2]              | slope: $-3.87 \times 10^{-3}$<br>thresh: -0.653  | $pre_{I5pvE}$        | 0.25    | No data      | slope: $1.03 \times 10^{-2}$<br>thresh: -0.941                |
| $Rin_{I5om}$        | 250 M $\Omega$ | [4]              | slope: $7.55 \times 10^{-3}$<br>thresh: 0.465    | $pre_{I5pvI5pv}$     | 0.25    | No data      | slope: $1.21 \times 10^{-3}$<br>thresh: -0.061                |
| $\tau m_E$          | 28 ms          | [2]              | slope: $-9.59 \times 10^{-3}$<br>thresh: 0.268   | $pre_{I5pvI5ht}$     | 0.25    | No data      | slope: $-4.73 \times 10^{-3}$<br>thresh: 0.011                |
| $\tau m_{I5pv}$     | 21 ms          | [2]              | slope: $4.82 \times 10^{-3}$<br>thresh: 0.027    | $pre_{I5htE}$        | 0.25    | No data      | slope: $-1.63 \times 10^{-3}$<br>thresh: -0.379               |
| $\tau m_{I5ht}$     | 10 ms          | [2]              | slope: $-5.09 \times 10^{-3}$<br>thresh: -0.302  | $pre_{I5htI5pv}$     | 0.25    | No data      | slope: $-3.41 \times 10^{-3}$<br>thresh: -0.262               |
| $\tau m_{I5om}$     | 30 ms          | [4]              | slope: $-2.89 \times 10^{-3}$<br>thresh: -0.159  | $pre_{I5htI5ht}$     | 0.25    | No data      | slope: $3.05 \times 10^{-3}$<br>thresh: 0.123                 |
| $tref_E$            | 55.5 ms        | [2]              | Not tested                                       | $p_{rel,I5omE}$      | 0.25    | No data      | slope: $-2.13 \times 10^{-4}$<br>thresh: -0.65                |
| $tref_{I5pv}$       | 5.4 ms         | [2]              | Not tested                                       | $W_{EL4E,mean}$      | 0.8 mV  | [1]          | slope: -0.142<br>thresh: 0.342                                |
| $tref_{I5ht}$       | 21.3 ms        | [2]              | Not tested                                       | $W_{EL4E,median}$    | 0.48 mV | [1]          | slope: -0.142<br>thresh: 0.342                                |
| $tref_{I5om}$       | 20 ms          | [3]              | Not tested                                       | $W_{EL4I5pv,mean}$   | 0.8 mV  | = $W_{EL4E}$ | slope: $3.61 \times 10^{-3}$<br>thresh: $6.54 \times 10^{-3}$ |
| $\tau syn_{E,e}$    | 2 ms           | Typical          | slope: $1.37 \times 10^{-2}$<br>thresh: -1.79    | $W_{EL4I5pv,median}$ | 0.48 mV | = $W_{EL4E}$ | slope: $3.61 \times 10^{-3}$<br>thresh: $6.54 \times 10^{-3}$ |
| $\tau syn_{E,i}$    | 40 ms          | [2]              | slope: $-7.29 \times 10^{-3}$<br>thresh: 0.48    | $W_{EL4I5om,mean}$   | 0.8 mV  | = $W_{EL4E}$ | slope: $5.05 \times 10^{-3}$<br>thresh: -0.329                |
| $\tau syn_{I5pv,e}$ | 2 ms           | Typical          | slope: $-9.79 \times 10^{-3}$<br>thresh: -0.477  | $W_{EL4I5om,median}$ | 0.48 mV | = $W_{EL4E}$ | slope: $5.05 \times 10^{-3}$<br>thresh: -0.329                |
| $\tau syn_{I5pv,i}$ | 16 ms          | [2]              | slope: $1.56 \times 10^{-3}$<br>thresh: -0.097   | $W_{EE,mean}$        | 0.37 mV | [2]          | slope: $7.44 \times 10^{-3}$<br>thresh: 5.34                  |
| $\tau syn_{I5ht,e}$ | 2 ms           | Typical          | slope: $4.52 \times 10^{-3}$<br>thresh: -0.047   | $W_{EE,median}$      | 0.2 mV  | [2]          | slope: $7.44 \times 10^{-3}$<br>thresh: 5.34                  |
| $\tau syn_{I5ht,i}$ | 40 ms          | [2]              | slope: $-3.82 \times 10^{-3}$<br>thresh: -0.387  | $W_{EI5pv,mean}$     | 0.82 mV | [2]          | slope: $-3.77 \times 10^{-4}$<br>thresh: -0.297               |
| $\tau syn_{I5om,e}$ | 2 ms           | Typical          | slope: -0.0126<br>thresh: $-8.82 \times 10^{-3}$ | $W_{EI5pv,median}$   | 0.68 mV | [2]          | slope: $-3.77 \times 10^{-4}$<br>thresh: -0.297               |
| $\tau syn_{I5om,i}$ | 40 ms          | [2]              | slope: $-4.88 \times 10^{-3}$<br>thresh: -0.301  | $W_{EI5ht,mean}$     | 0.39 mV | [2]          | slope: $-6.81 \times 10^{-3}$<br>thresh: -0.46                |
| $Erev_e$            | 0 mV           | Typical          | slope: -0.056<br>thresh: 1.53                    | $W_{EI5ht,median}$   | 0.19 mV | [2]          | slope: $-6.81 \times 10^{-3}$<br>thresh: -0.46                |
| $Erev_{Ei}$         | -68 mV         | = $Vrest_E$      | slope: $3.2 \times 10^{-3}$<br>thresh: -3.77     | $W_{EI5om,mean}$     | 0.5 mV  | No data      | slope: $-3.61 \times 10^{-3}$<br>thresh: -0.359               |
| $Erev_{I5vi}$       | -68 mV         | = $Vrest_{I5pv}$ | slope: -0.010                                    | $W_{EI5om,median}$   | 0.4 mV  | No data      | slope: $-3.61 \times 10^{-3}$                                 |

|                   |        |                 |                                                  |                       |          |         |                                                 |
|-------------------|--------|-----------------|--------------------------------------------------|-----------------------|----------|---------|-------------------------------------------------|
|                   |        |                 | thresh: -0.617                                   |                       |          |         | thresh: -0.359                                  |
| $Erev_{I5ht}$     | -62 mV | $=Vrest_{I5ht}$ | slope: $3.8 \times 10^{-3}$<br>thresh: 0.132     | $W_{IpvE,mean}$       | 0.52 mV  | [2]     | slope: $6.41 \times 10^{-3}$<br>thresh: -1.47   |
| $Erev_{I5om}$     | -57 mV | $=Vrest_{I5om}$ | slope: $-4.2 \times 10^{-3}$<br>thresh: -0.088   | $W_{IpvE,median}$     | -0.29 mV | [2]     | slope: $6.41 \times 10^{-3}$<br>thresh: -1.47   |
| $pcon_{EL4E}$     | 0.15   | No data         | slope: -0.121<br>thresh: 2.99                    | $W_{IpvIpv,mean}$     | -0.56 mV | [2]     | slope: $-2.52 \times 10^{-3}$<br>thresh: -0.345 |
| $pcon_{EL4Ipv}$   | 0.15   | No data         | slope: $1.38 \times 10^{-3}$<br>thresh: 0.029    | $W_{IpvIpv,median}$   | -0.44 mV | [2]     | slope: $-2.52 \times 10^{-3}$<br>thresh: -0.345 |
| $pcon_{EL4I5ht}$  | 0      | No data         | Not tested                                       | $W_{IpvI5ht,mean}$    | -0.83 mV | [2]     | slope: $-4.24 \times 10^{-3}$<br>thresh: -0.266 |
| $pcon_{EL4I5om}$  | 0.15   | No data         | slope: $7.62 \times 10^{-3}$<br>thresh: -0.245   | $W_{IpvI5ht,median}$  | -0.6 mV  | [2]     | slope: $-4.24 \times 10^{-3}$<br>thresh: -0.266 |
| $pcon_{EE}$       | 0.17   | [2]             | slope: $5.86 \times 10^{-3}$<br>thresh: 6.084    | $W_{I5htE,mean}$      | -0.49 mV | [2]     | slope: $-3.61 \times 10^{-4}$<br>thresh: -0.018 |
| $pcon_{EIpV}$     | 0.575  | [2]             | slope: $-1.17 \times 10^{-3}$<br>thresh: -0.099  | $W_{I5htE,median}$    | -0.3 mV  | [2]     | slope: $-3.61 \times 10^{-4}$<br>thresh: -0.018 |
| $pcon_{EII5ht}$   | 0.24   | [2]             | slope: $-6.44 \times 10^{-3}$<br>thresh: -0.541  | $W_{I5htIpv,mean}$    | -0.49 mV | [2]     | slope: $-1.77 \times 10^{-3}$<br>thresh: -0.187 |
| $pcon_{EII5om}$   | 0.5    | [5]             | slope: $-4.37 \times 10^{-3}$<br>thresh: -0.27   | $W_{I5htIpv,median}$  | -0.15 mV | [2]     | slope: $-1.77 \times 10^{-3}$<br>thresh: -0.187 |
| $pcon_{I5htE}$    | 0.6    | [2]             | slope: $7.16 \times 10^{-3}$<br>thresh: -1.049   | $W_{I5htI5ht,mean}$   | -0.37 mV | [2]     | slope: $-4.12 \times 10^{-3}$<br>thresh: -0.416 |
| $pcon_{I5htI5ht}$ | 0.55   | [2]             | slope: $-2.61 \times 10^{-3}$<br>thresh: -0.0456 | $W_{I5htI5ht,median}$ | -0.23 mV | [2]     | slope: $-4.12 \times 10^{-3}$<br>thresh: -0.416 |
| $pcon_{I5htI5om}$ | 0.24   | [2]             | slope: $-2.81 \times 10^{-3}$<br>thresh: -0.458  | $W_{I5omE,mean}$      | -0.5 mV  | No data | slope: -0.013<br>thresh: -0.984                 |
| $pcon_{I5htI5om}$ | 0      | No data         | Not tested                                       | $W_{I5omE,median}$    | -0.4 mV  | No data | slope: -0.013<br>thresh: -0.984                 |

501 Source [1] is (Lefort et al., 2009), [2] is (Avermann et al., 2012), [3] is (Fanselow et al., 2008),  
 502 [4] is (Kinnischtzke et al., 2012), [5] is (Fino and Yuste, 2011).  $N$  is number of neurons,  $Vrest$  is  
 503 resting potential,  $Vth$  is spike voltage threshold,  $Rin$  is input resistance,  $tref$  is refractory period,  
 504  $\tau m$  is the membrane time constant,  $\tau syn$  is the synaptic time constant with the first subscript  
 505 indicating the postsynaptic neuron type and the second subscript the neurotransmitter type of  
 506 the presynaptic neuron ( $e$  or  $i$ ),  $Erev$  is the synaptic reversal potential,  $pcon$  is the synaptic  
 507 connection probability,  $prel$  is the synaptic release probability,  $w$  is the mean or median post-  
 508 synaptic potential amplitude as indicated. For all neuronal parameters, the subscript indicates  
 509 the neuron type:  $E$  is L2/3 excitatory neurons,  $Ipv$  is PV neurons,  $I5ht$  is 5HT<sub>3A</sub>R neurons,  $I5om$   
 510 is SOM neurons, and  $EL4$  is L4 excitatory neurons. For synaptic parameters, the first and  
 511 second subscripts indicate the pre- and post-synaptic neuron types, respectively.

## 512 **Logistic model**

513 From the L2/3 circuit model simulations, we numerically estimated the probability  $q$  that each  
 514 neuron in the model fires a spike as a function of the fraction of L4 inputs that were active,  $f$ .

515 We then used the generalized linear model regression tool ‘glmfit’ in MATLAB to find the best  
516 fit of the two logistic model parameters for each neuron:

$$517 \quad q(f) = \frac{1}{1 + \exp(-\beta(f - f_{1/2}))} ,$$

518 where the parameter  $\beta$  represents the slope, and the parameter  $f_{1/2}$  represents the fraction of  
519 active L4 neurons at which the response probability  $q = 0.5$ . For clarity of presentation, in the  
520 main text we converted this  $f_{1/2}$  parameter to what we termed the ‘threshold’,  $f_{thresh}$ , which we  
521 defined as the fraction of L4 neurons needed to reach a specified spike probability,  $q_{thresh}$ .  
522 Throughout the study we fixed  $q_{thresh} = 0.01$ . The threshold is related to  $f_{1/2}$  via the inverse of  
523 the logistic function

$$524 \quad f_{thresh} = f_{1/2} + \log\left(\frac{q_{thresh}}{1 - q_{thresh}}\right) / \beta.$$

525 We computed firing rates and pairwise correlations from the logistic model (Figures 3–4) in  
526 the following way. First, we assumed that the fraction of active L4 neurons is described by a  
527 normally distributed random variable with zero mean and unit variance:

$$528 \quad p(f) = \frac{\exp(-f^2/2)}{\sqrt{2\pi}} = \mathcal{N}(0,1) .$$

529 We defined the  $\beta$  and  $f_{1/2}$  parameters relative to the mean and standard deviation of the input  
530 distribution. Since  $q$  is a monotonically increasing function of  $f$ , the probability distribution for  $q$   
531 is

$$p(q) = p(f(q)) \left| \frac{df}{dq} \right|$$

532 where  $f(q)$  is the inverse of the logistic function  $q(f)$  and

$$533 \quad \frac{df}{dq} = \frac{(\exp(-\beta(f - f_{1/2})) + 1)^2}{\beta \exp(-\beta(f - f_{1/2}))} .$$
 We calculate a neuron’s mean firing rate  $\mu$  as the expectation of  $q$ ,

$$534 \quad \mu = \mathbb{E}[q] = \int_0^1 [q \times p(q)] dq = \int_0^1 \left[ q \times p(f(q)) \left| \frac{df}{dq} \right| \right] dq .$$

535 We calculate the pairwise covariance of two homogeneous neurons driven by a common input  
536  $f$  as

$$537 \quad \text{cov} = \mathbb{E}[q^2] - (\mathbb{E}[q])^2 = \mathbb{E}[q^2] - \mu^2 = \int_0^1 \left[ q^2 \times p(f(q)) \left| \frac{df}{dq} \right| \right] dq - \mu^2 ,$$
 then find the pairwise

538 correlation by normalizing the covariance by the neurons’ shared variance,  $\text{var} = \mu(1 - \mu)$ .

539 For fitting the logistic model to the recorded neural firing rates and correlations (Figure 4), we  
540 considered a population model where the joint probability distribution across threshold and  
541 slope was specified by a 2D Gaussian, which has five parameters: threshold mean and s.d.,  
542 slope mean and s.d., and slope-threshold correlation. The three constraint statistics we  
543 considered from the neural population data were the mean neural ON probability, the s.d. of  
544 neural ON probabilities, and the mean pairwise correlations. We found the best-fit model  
545 parameters for each dataset using stochastic gradient descent. We checked for fit  
546 convergence by sampling a large number of logistic model parameters from the fitted 2D  
547 Gaussian, drawing binary samples from these logistic ‘neurons’ and computing the ON  
548 probability mean and s.d., and mean pairwise correlation from the synthetic binary samples,  
549 and comparing the computed statistical values to the original data statistics. For the sensitivity  
550 analysis presented in Figure 5, we numerically computed the partial derivative in mean firing  
551 rate and pairwise correlation with respect to the mean slope and mean threshold parameters in  
552 the population logistical model, using standard finite difference methods.

### 553 **Statistical tests**

554 To avoid parametric assumptions, all statistical tests were done using standard bootstrapping  
555 methods with custom-written MATLAB scripts. For example when assessing the observed  
556 difference between two group means  $\Delta\mu_{\text{obs}}$  we performed the following procedure to calculate  
557 a p-value. First we pool the data points from the two groups to create a null set  $S_{\text{null}}$ . We then  
558 construct two hypothetical groups of samples  $S_1$  and  $S_2$  from this by randomly drawing  $n_1$  and  
559  $n_2$  samples with replacement from  $S_{\text{null}}$ , where  $n_1$  and  $n_2$  are the number of data points in the  
560 original groups 1 and 2 respectively. We take the mean of both hypothetical sets  $\Delta\mu_1$  and  $\Delta\mu_2$   
561 and calculate their difference  $\Delta\mu_{\text{null}} = \Delta\mu_1 - \Delta\mu_2$ . We then repeat the entire procedure  $10^7$   
562 times to build up a histogram of  $\Delta\mu_{\text{null}}$ . This distribution is always centered at zero. After  
563 normalizing, this can be interpreted as the probability distribution  $f(\Delta\mu_{\text{null}})$  for observing a group  
564 mean difference of  $\Delta\mu_{\text{null}}$  purely by chance if the data were actually sampled from the same  
565 null distribution. Then the final p-value for the probability of finding a group difference of at  
566 least  $\Delta\mu_{\text{obs}}$  in either direction is given by  $p = \int_{-\infty}^{-\Delta\mu_{\text{obs}}} f(\Delta\mu_{\text{null}})d\Delta\mu_{\text{null}} + \int_{\Delta\mu_{\text{obs}}}^{\infty} f(\Delta\mu_{\text{null}})d\Delta\mu_{\text{null}}$ .

567 **Conversion from firing rate to ON/OFF probabilities for  $Ca^{2+}$  imaging data**

568 For the  $Ca^{2+}$  imaging data, we began with estimated firing rate time series  $r_i(t)$  for each neuron  
569  $i$  recorded as part of a population of  $N$  neurons. For later parts of the analysis we needed to  
570 convert these firing rates to binary ON/OFF values. This conversion involves a choice. One  
571 option would be to simply threshold the data, but this would throw away information about the  
572 magnitude of the firing rate. We instead take a probabilistic approach where rather than  
573 deciding definitively whether a given neuron was ON or OFF in a given time bin, we calculate  
574 the probability that the neuron was ON or OFF by assuming that neurons fire action potentials  
575 according to an inhomogeneous Poisson process with rate  $r_i(t)$ . The mean number of spikes  
576  $\lambda_i(t)$  expected in a time bin of width  $\Delta t$  is  $\lambda_i(t) = r_i(t)\Delta t$ . We choose  $\Delta t = 1$  second. Under the  
577 Poisson model the actual number of spikes  $m$  in a particular time bin is a random variable that  
578 follows the Poisson distribution  $P(m=k) = \lambda^k \exp(-\lambda) / k!$ . We considered a neuron active (ON) if  
579 it is firing one or more spikes in a given time bin. Hence the probability that a neuron is ON is  
580  $p_{on}(t) = 1 - P(m=0) = 1 - \exp(-\lambda)$ . This approach has two advantages over thresholding: 1) it  
581 preserves some information about the magnitude of firing rates, and 2) it acts to regularize the  
582 probability distribution for the number of neurons active by essentially smoothing nearby values  
583 together.

584 **Entropy estimation for large numbers of neurons**

585 Entropy was estimated by fitting a statistical model we recently developed, called the  
586 population tracking model (O'Donnell et al., 2017), to the binarized  $Ca^{2+}$  imaging data. Briefly,  
587 the population tracking model fits two aspects of the data: the probability distribution for the  
588 number of neurons synchronously active in the population, and also the conditional firing  
589 probability that each individual neuron is active given the population count. Hence the model  
590 captures both some aggregate statistics of the population activity, and some aspects of the  
591 heterogeneity across neurons. See O'Donnell et al. (2017) for complete details and validation  
592 of the method. Code for fitting the model to data is available at  
593 <https://github.com/cianodonnell/PopulationTracking>.

594 The entropy/neuron generally decreased with the number of neurons considered as result of  
595 the population correlations (Figure 6B), so we needed to control for neural population size

596 when comparing data from different experimental groups. On the one hand, we would like to  
597 study as large a number of neurons as possible, because we expect the effects of collective  
598 network dynamics to be stronger for large population sizes and this may be the regime where  
599 differences between the groups emerge. On the other hand, our recording methods allowed us  
600 to sample only typically around ~100 neurons at a time, and as few as 40 neurons in some  
601 animals. Hence we proceeded by first estimating the entropy/neuron in each animal by  
602 calculating the entropy of random subsets of neurons of varying size from 10 to 100 (if  
603 possible) in steps of 10. For each population size we sampled a large number of independent  
604 subsets, calculated the entropy of each. Finally, for each dataset we fit a double exponential  
605 function to the estimated entropy/neuron as a function of the number of neurons:  $H/N = A \cdot \exp(-$   
606  $b \cdot N) + C \cdot \exp(-d \cdot N) + e$ , and used this fit to estimate  $H/N$  for 100 neurons.

## 607 Acknowledgements

608 We thank Timothy O'Leary, Hannes Saal, and Alex Williams for comments on earlier versions  
609 of the manuscript. This study was supported by funding from FRAXA Research Foundation,  
610 Howard Hughes Medical Institute, Sloan-Swartz Foundation, the Dana Foundation,  
611 Developmental Disabilities Translational Research Program grant #20160969 (The John Merck

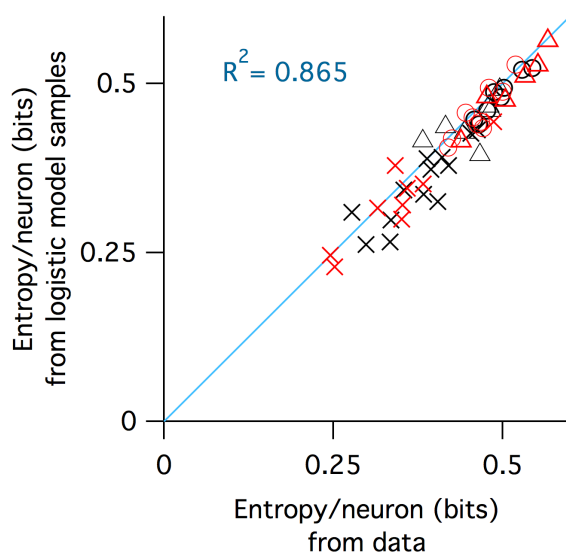

**Supp Fig 1. Agreement between entropy estimated from raw data and entropy estimated from samples from fitted logistic models.** Black symbols are WT, red are KO. Crosses are P9–11, circles P14–16, triangles P30–40. Blue line is identity, the  $R^2$  value of which is reported in the inset.

612 Fund), SFARI grant 295438 (Simons Foundation) and the NIH (NICHD R01HD054453 and  
613 NINDS RC1NS068093).

614 **Competing Interests**

615 The authors have no competing interests to declare.



## 616 References

- 617 Avermann, M., Tomm, C., Mateo, C., Gerstner, W., Petersen, C.C.H., 2012. Microcircuits of  
618 excitatory and inhibitory neurons in layer 2/3 of mouse barrel cortex. *J Neurophysiol* 107,  
619 3116–3134. doi:10.1152/jn.00917.2011
- 620 Bateup, H.S., Takasaki, K.T., Saulnier, J.L., Deneffrio, C.L., Sabatini, B.L., 2011. Loss of Tsc1  
621 in vivo impairs hippocampal mGluR-LTD and increases excitatory synaptic function. *J*  
622 *Neurosci* 31, 8862–8869. doi:10.1523/JNEUROSCI.1617-11.2011
- 623 Belmonte, M.K., Allen, G., Beckel-Mitchener, A., Boulanger, L.M., Carper, R.A., Webb, S.J.,  
624 2004. Autism and abnormal development of brain connectivity. *J Neurosci* 24, 9228–9231.  
625 doi:10.1523/JNEUROSCI.3340-04.2004
- 626 Berkes, P., Orbán, G., Lengyel, M., Fiser, J., 2011. Spontaneous cortical activity reveals  
627 hallmarks of an optimal internal model of the environment. *Science* 331, 83–87.  
628 doi:10.1126/science.1195870
- 629 Berzhanskaya, J., Phillips, M.A., Shen, J., Colonnese, M.T., 2016. Sensory hypo-excitability in  
630 a rat model of fetal development in Fragile X Syndrome. *Sci Rep* 6, 30769.  
631 doi:10.1038/srep30769
- 632 Braat, S., Kooy, R.F., 2015. The GABAA Receptor as a Therapeutic Target for  
633 Neurodevelopmental Disorders. *Neuron* 86, 1119–1130. doi:10.1016/j.neuron.2015.03.042
- 634 Bureau, I., Shepherd, G.M.G., Svoboda, K., 2008. Circuit and plasticity defects in the  
635 developing somatosensory cortex of FMR1 knock-out mice. *J Neurosci* 28, 5178–5188.  
636 doi:10.1523/JNEUROSCI.1076-08.2008
- 637 Clancy, K.B., Schnepel, P., Rao, A.T., Feldman, D.E., 2015. Structure of a single whisker  
638 representation in layer 2 of mouse somatosensory cortex. *J Neurosci* 35, 3946–3958.  
639 doi:10.1523/JNEUROSCI.3887-14.2015
- 640 Contractor, A., Klyachko, V.A., Portera-Cailliau, C., 2015. Altered Neuronal and Circuit  
641 Excitability in Fragile X Syndrome. *Neuron* 87, 699–715. doi:10.1016/j.neuron.2015.06.017
- 642 Cover, T.M., Thomas, J.A., 2006. *Elements of Information Theory*, 2nd ed. Wiley-Interscience.
- 643 Cruz-Martin, A., Crespo, M., Portera-Cailliau, C., 2010. Delayed Stabilization of Dendritic  
644 Spines in Fragile X Mice. *J Neurosci* 30, 7793–7803. doi:10.1523/JNEUROSCI.0577-  
645 10.2010
- 646 Dani, V.S., Chang, Q., Maffei, A., Turrigiano, G.G., Jaenisch, R., Nelson, S.B., 2005. Reduced  
647 cortical activity due to a shift in the balance between excitation and inhibition in a mouse  
648 model of Rett syndrome. *Proc. Natl. Acad. Sci. U.S.A.* 102, 12560–12565.  
649 doi:10.1073/pnas.0506071102
- 650 Fanselow, E.E., Richardson, K.A., Connors, B.W., 2008. Selective, state-dependent activation  
651 of somatostatin-expressing inhibitory interneurons in mouse neocortex. *J Neurophysiol* 100,  
652 2640–2652. doi:10.1152/jn.90691.2008
- 653 Fino, E., Yuste, R., 2011. Dense inhibitory connectivity in neocortex. *Neuron* 69, 1188–1203.  
654 doi:10.1016/j.neuron.2011.02.025
- 655 Frye, C.G., Maclean, J.N., 2016. Spontaneous activations follow a common developmental  
656 course across primary sensory areas in mouse neocortex. *J Neurophysiol* 116, 431–437.  
657 doi:10.1152/jn.00172.2016
- 658 Gentet, L.J., Kremer, Y., Taniguchi, H., Huang, Z.J., Staiger, J.F., Petersen, C.C.H., 2012.



- 659 Unique functional properties of somatostatin-expressing GABAergic neurons in mouse  
660 barrel cortex. *Nat Neurosci* 15, 607–612. doi:10.1038/nn.3051
- 661 Gibson, J.R., Bartley, A.F., Hays, S.A., Huber, K.M., 2008. Imbalance of neocortical excitation  
662 and inhibition and altered UP states reflect network hyperexcitability in the mouse model of  
663 fragile X syndrome. *J Neurophysiol* 100, 2615–2626. doi:10.1152/jn.90752.2008
- 664 Golshani, P., Gonçalves, J.T., Khoshkhou, S., Mostany, R., Smirnakis, S., Portera-Cailliau, C.,  
665 2009. Internally mediated developmental desynchronization of neocortical network activity.  
666 *J Neurosci* 29, 10890–10899. doi:10.1523/JNEUROSCI.2012-09.2009
- 667 Gonçalves, J.T., Anstey, J.E., Golshani, P., Portera-Cailliau, C., 2013. Circuit level defects in  
668 the developing neocortex of Fragile X mice. *Nat Neurosci* 16, 903–909.  
669 doi:10.1038/nn.3415
- 670 Goodman, D.F.M., Brette, R., 2009. The brain simulator. *Front Neurosci* 3, 192–197.  
671 doi:10.3389/neuro.01.026.2009
- 672 Gutenkunst, R.N., Waterfall, J.J., Casey, F.P., Brown, K.S., Myers, C.R., Sethna, J.P., 2007.  
673 Universally sloppy parameter sensitivities in systems biology models. *PLoS Comput Biol* 3,  
674 1871–1878. doi:10.1371/journal.pcbi.0030189
- 675 Harlow, E.G., Till, S.M., Russell, T.A., Wijetunge, L.S., Kind, P., Contractor, A., 2010. Critical  
676 period plasticity is disrupted in the barrel cortex of FMR1 knockout mice. *Neuron* 65, 385–  
677 398. doi:10.1016/j.neuron.2010.01.024
- 678 Hays, S.A., Huber, K.M., Gibson, J.R., 2011. Altered neocortical rhythmic activity states in  
679 *Fmr1* KO mice are due to enhanced mGluR5 signaling and involve changes in excitatory  
680 circuitry. *J Neurosci* 31, 14223–14234. doi:10.1523/JNEUROSCI.3157-11.2011
- 681 He, Q., Nomura, T., Xu, J., Contractor, A., 2014. The developmental switch in GABA polarity is  
682 delayed in fragile X mice. *J Neurosci* 34, 446–450. doi:10.1523/JNEUROSCI.4447-13.2014
- 683 Kehrer, C., Maziashvili, N., Dugladze, T., Gloveli, T., 2008. Altered Excitatory-Inhibitory  
684 Balance in the NMDA-Hypofunction Model of Schizophrenia. *Frontiers in Molecular*  
685 *Neuroscience* 1, 6. doi:10.3389/neuro.02.006.2008
- 686 Kerr, J.N.D., de Kock, C.P.J., Greenberg, D.S., Bruno, R.M., Sakmann, B., Helmchen, F., 2007.  
687 Spatial organization of neuronal population responses in layer 2/3 of rat barrel cortex. *J*  
688 *Neurosci* 27, 13316–13328. doi:10.1523/JNEUROSCI.2210-07.2007
- 689 Kinnischtzke, A.K., Sewall, A.M., Berkepile, J.M., Faselow, E.E., 2012. Postnatal maturation  
690 of somatostatin-expressing inhibitory cells in the somatosensory cortex of GIN mice. *Front*  
691 *Neural Circuits* 6, 33. doi:10.3389/fncir.2012.00033
- 692 La Fata, G., Gärtner, A., Domínguez-Iturza, N., Dresselaers, T., Dawitz, J., Poorthuis, R.B.,  
693 Avena, M., Himmelreich, U., Meredith, R.M., Achsel, T., Dotti, C.G., Bagni, C., 2014.  
694 FMRP regulates multipolar to bipolar transition affecting neuronal migration and cortical  
695 circuitry. *Nat Neurosci*. doi:10.1038/nn.3870
- 696 Lefort, S., Tómm, C., Floyd Sarria, J.-C., Petersen, C.C.H., 2009. The excitatory neuronal  
697 network of the C2 barrel column in mouse primary somatosensory cortex. *Neuron* 61, 301–  
698 316. doi:10.1016/j.neuron.2008.12.020
- 699 Lu, H., Ash, R.T., He, L., Kee, S.E., Wang, W., Yu, D., Hao, S., Meng, X., Ure, K., Ito-Ishida, A.,  
700 Tang, B., Sun, Y., Ji, D., Tang, J., Arenkiel, B.R., Smirnakis, S.M., Zoghbi, H.Y., 2016.  
701 Loss and Gain of MeCP2 Cause Similar Hippocampal Circuit Dysfunction that Is Rescued  
702 by Deep Brain Stimulation in a Rett Syndrome Mouse Model. *Neuron* 91, 739–747.

- 703 doi:10.1016/j.neuron.2016.07.018  
704 Luczak, A., Bartho, P., Harris, K.D., 2009. Spontaneous events outline the realm of possible  
705 sensory responses in neocortical populations. *Neuron* 62, 413–425.  
706 doi:10.1016/j.neuron.2009.03.014  
707 Mao, T., Kusefoglou, D., Hooks, B.M., Huber, D., Petreanu, L., Svoboda, K., 2011. Long-range  
708 neuronal circuits underlying the interaction between sensory and motor cortex. *Neuron* 72,  
709 111–123. doi:10.1016/j.neuron.2011.07.029  
710 Meredith, R.M., Dawitz, J., Kramvis, I., 2012. Sensitive time-windows for susceptibility in  
711 neurodevelopmental disorders. *Trends Neurosci* 35, 335–344.  
712 doi:10.1016/j.tins.2012.03.005  
713 Miller, J.-E.K., Ayzenshtat, I., Carrillo-Reid, L., Yuste, R., 2014. Visual stimuli recruit  
714 intrinsically generated cortical ensembles. 111, E4053–E4061.  
715 doi:10.1073/pnas.1406077111  
716 Mitra, A., Snyder, A.Z., Blazey, T., Raichle, M.E., 2015. Lag threads organize the brain's  
717 intrinsic activity. *Proc. Natl. Acad. Sci. U.S.A.* 112, E2235–E2244.  
718 doi:10.1073/pnas.1503960112  
719 O'Donnell, C., Gonçalves, J.T., Whiteley, N., Portera-Cailliau, C., Sejnowski, T.J., 2017. The  
720 Population Tracking Model: A Simple, Scalable Statistical Model for Neural Population Data.  
721 *Neural Comput* 29, 50–93. doi:10.1162/NECO\_a\_00910  
722 O'Leary, T., Sutton, A.C., Marder, E., 2015. Computational models in the age of large datasets.  
723 *Curr Opin Neurobiol* 32C, 87–94. doi:10.1016/j.conb.2015.01.006  
724 Paluszkiewicz, S.M., Olmos-Serrano, J.L., Corbin, J.G., Huntsman, M.M., 2011. Impaired  
725 inhibitory control of cortical synchronization in fragile X syndrome. *J Neurophysiol* 106,  
726 2264–2272. doi:10.1152/jn.00421.2011  
727 Patel, A.B., Hays, S.A., Bureau, I., Huber, K.M., Gibson, J.R., 2013. A target cell-specific role  
728 for presynaptic *Fmr1* in regulating glutamate release onto neocortical fast-spiking inhibitory  
729 neurons. *J Neurosci* 33, 2593–2604. doi:10.1523/JNEUROSCI.2447-12.2013  
730 Petersen, C.C.H., Crochet, S., 2013. Synaptic computation and sensory processing in  
731 neocortical layer 2/3. *Neuron* 78, 28–48. doi:10.1016/j.neuron.2013.03.020  
732 Petreanu, L., Huber, D., Sobczyk, A., Svoboda, K., 2007. Channelrhodopsin-2-assisted circuit  
733 mapping of long-range callosal projections. *Nature neuroscience*. doi:10.1038/nn1891  
734 Pologruto, T.A., Yasuda, R., Svoboda, K., 2004. Monitoring neural activity and [Ca<sup>2+</sup>] with  
735 genetically encoded Ca<sup>2+</sup> indicators. *J Neurosci* 24, 9572–9579.  
736 doi:10.1523/JNEUROSCI.2854-04.2004  
737 Qian, N., Lipkin, R.M., 2011. A learning-style theory for understanding autistic behaviors. *Front*  
738 *Hum Neurosci* 5, 77. doi:10.3389/fnhum.2011.00077  
739 Quian Quiroga, R., Panzeri, S., 2009. Extracting information from neuronal populations:  
740 information theory and decoding approaches. *Nat Rev Neurosci* 10, 173–185.  
741 doi:10.1038/nrn2578  
742 Ringach, D.L., 2009. Spontaneous and driven cortical activity: implications for computation.  
743 *Curr Opin Neurobiol* 19, 439–444. doi:10.1016/j.conb.2009.07.005  
744 Rochefort, N.L., Garaschuk, O., Milos, R.-I., Narushima, M., Marandi, N., Pichler, B.,  
745 Kovalchuk, Y., Konnerth, A., 2009. Sparsification of neuronal activity in the visual cortex at  
746 eye-opening. 106, 15049–15054. doi:10.1073/pnas.0907660106

- 747 Rubenstein, J.L.R., Merzenich, M.M., 2003. Model of autism: increased ratio of  
748 excitation/inhibition in key neural systems. *Genes Brain Behav.* 2, 255–267.
- 749 Sato, T.R., Gray, N.W., Mainen, Z.F., Svoboda, K., 2007. The functional microarchitecture of  
750 the mouse barrel cortex. *PLoS Biol* 5, e189. doi:10.1371/journal.pbio.0050189
- 751 Schneidman, E., Berry, M.J., Segev, R., Bialek, W., 2006. Weak pairwise correlations imply  
752 strongly correlated network states in a neural population. *Nature* 440, 1007–1012.  
753 doi:10.1038/nature04701
- 754 Selby, L., Zhang, C., Sun, Q.-Q., 2007. Major defects in neocortical GABAergic inhibitory  
755 circuits in mice lacking the fragile X mental retardation protein. *Neurosci. Lett.* 412, 227–  
756 232. doi:10.1016/j.neulet.2006.11.062
- 757 Testa-Silva, G., Loebel, A., Giugliano, M., de Kock, C.P.J., Mansvelder, H.D., Meredith, R.M.,  
758 2012. Hyperconnectivity and slow synapses during early development of medial prefrontal  
759 cortex in a mouse model for mental retardation and autism. *Cereb Cortex* 22, 1333–1342.  
760 doi:10.1093/cercor/bhr224
- 761 Tomm, C., Avermann, M., Petersen, C., Gerstner, W., Vogels, T.P., 2014. Connection-type-  
762 specific biases make uniform random network models consistent with cortical recordings. *J*  
763 *Neurophysiol* 112, 1801–1814. doi:10.1152/jn.00629.2013
- 764 Wallace, M.L., Burette, A.C., Weinberg, R.J., Philpot, B.D., 2012. Maternal loss of Ube3a  
765 produces an excitatory/inhibitory imbalance through neuron type-specific synaptic defects.  
766 *Neuron* 74, 793–800. doi:10.1016/j.neuron.2012.03.036
- 767 Yaksi, E., Friedrich, R.W., 2006. Reconstruction of firing rate changes across neuronal  
768 populations by temporally deconvolved Ca<sup>2+</sup> imaging. *Nat. Methods* 3, 377–383.  
769 doi:10.1038/nmeth874  
770
